# Supplementary material for: Visible-light-assisted selective catalytic reduction of NO with NH3 on porphyrin derivative-modified TiO2 photocatalysts
Source: Royal Society of Chemistry journal article supplement (doi:10.1039/c4cy00598h), 2014-09-18
Supplement: c4cy00598h1.pdf [file c4cy00598h1.pdf]

### Supporting information

Figure S1 shows the time profile of the conversion of NO in the photo-SCR over TiO<sub>2</sub>, TCPP-TiO<sub>2</sub>, and TCPP-SiO<sub>2</sub>. The photocatalytic conversion of NO over TCPP-TiO<sub>2</sub> maintained for 6 h without marked deactivation.

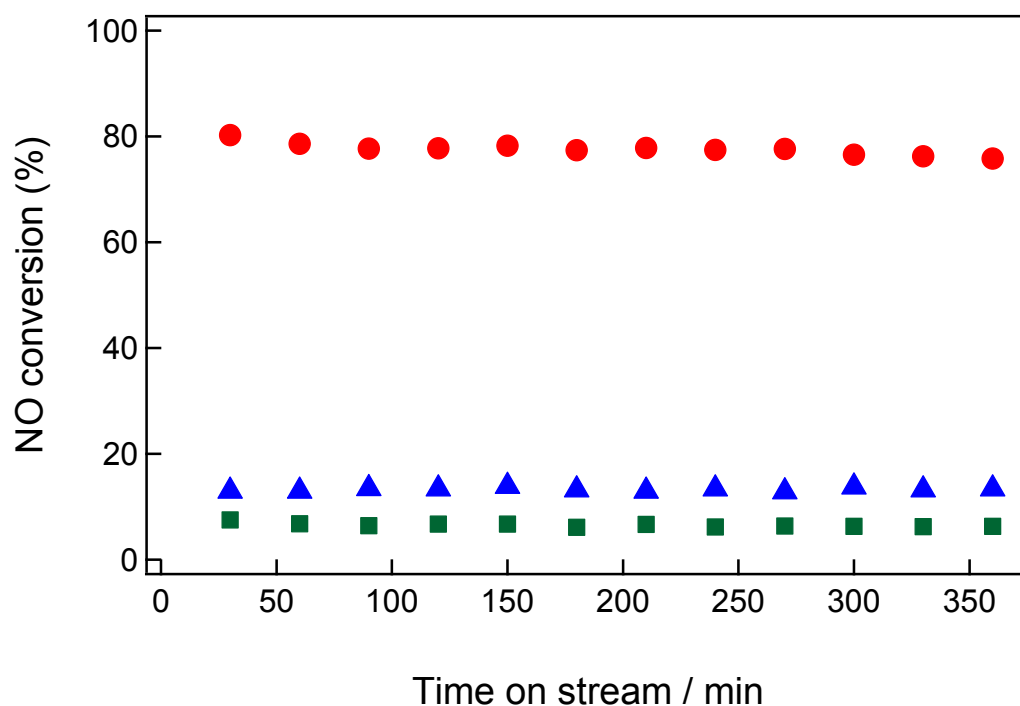

Figure S1. Time profile of conversion of NO in the photo-SCR over TiO<sub>2</sub> (▲), TCPP-TiO<sub>2</sub> (●), and TCPP-SiO<sub>2</sub> (■). (TCPP loading: 12.5 μmol g<sup>-1</sup>, catalyst amount: 110 mg, NO: 1000 ppm, NH<sub>3</sub>: 1000 ppm, O<sub>2</sub>: 2%, GHSV: 50,000 h<sup>-1</sup>).
